# Supplementary material for: Fuzzy Interactions Form and Shape the Histone Transport Complex
Source: PubMed Central journal article supplement — Mol Cell. 2019 Mar 21;73(6):1191–1203.e6. doi: 10.1016/j.molcel.2019.01.032 (PMC6436938; doi:10.1016/j.molcel.2019.01.032), 2019-03-21
Supplement: mmc1.pdf [file mmc1.pdf]

**Molecular Cell, Volume 73**

**Supplemental Information**

**Fuzzy Interactions Form and Shape**

**the Histone Transport Complex**

**Nives Ivic, Mia Potocnjak, Victor Solis-Mezarino, Franz Herzog, Silvija Bilokapic, and Mario Halic**

## **Supplemental Information**

**Ivic et al.**

Fuzzy interactions form and shape the histone transport complex

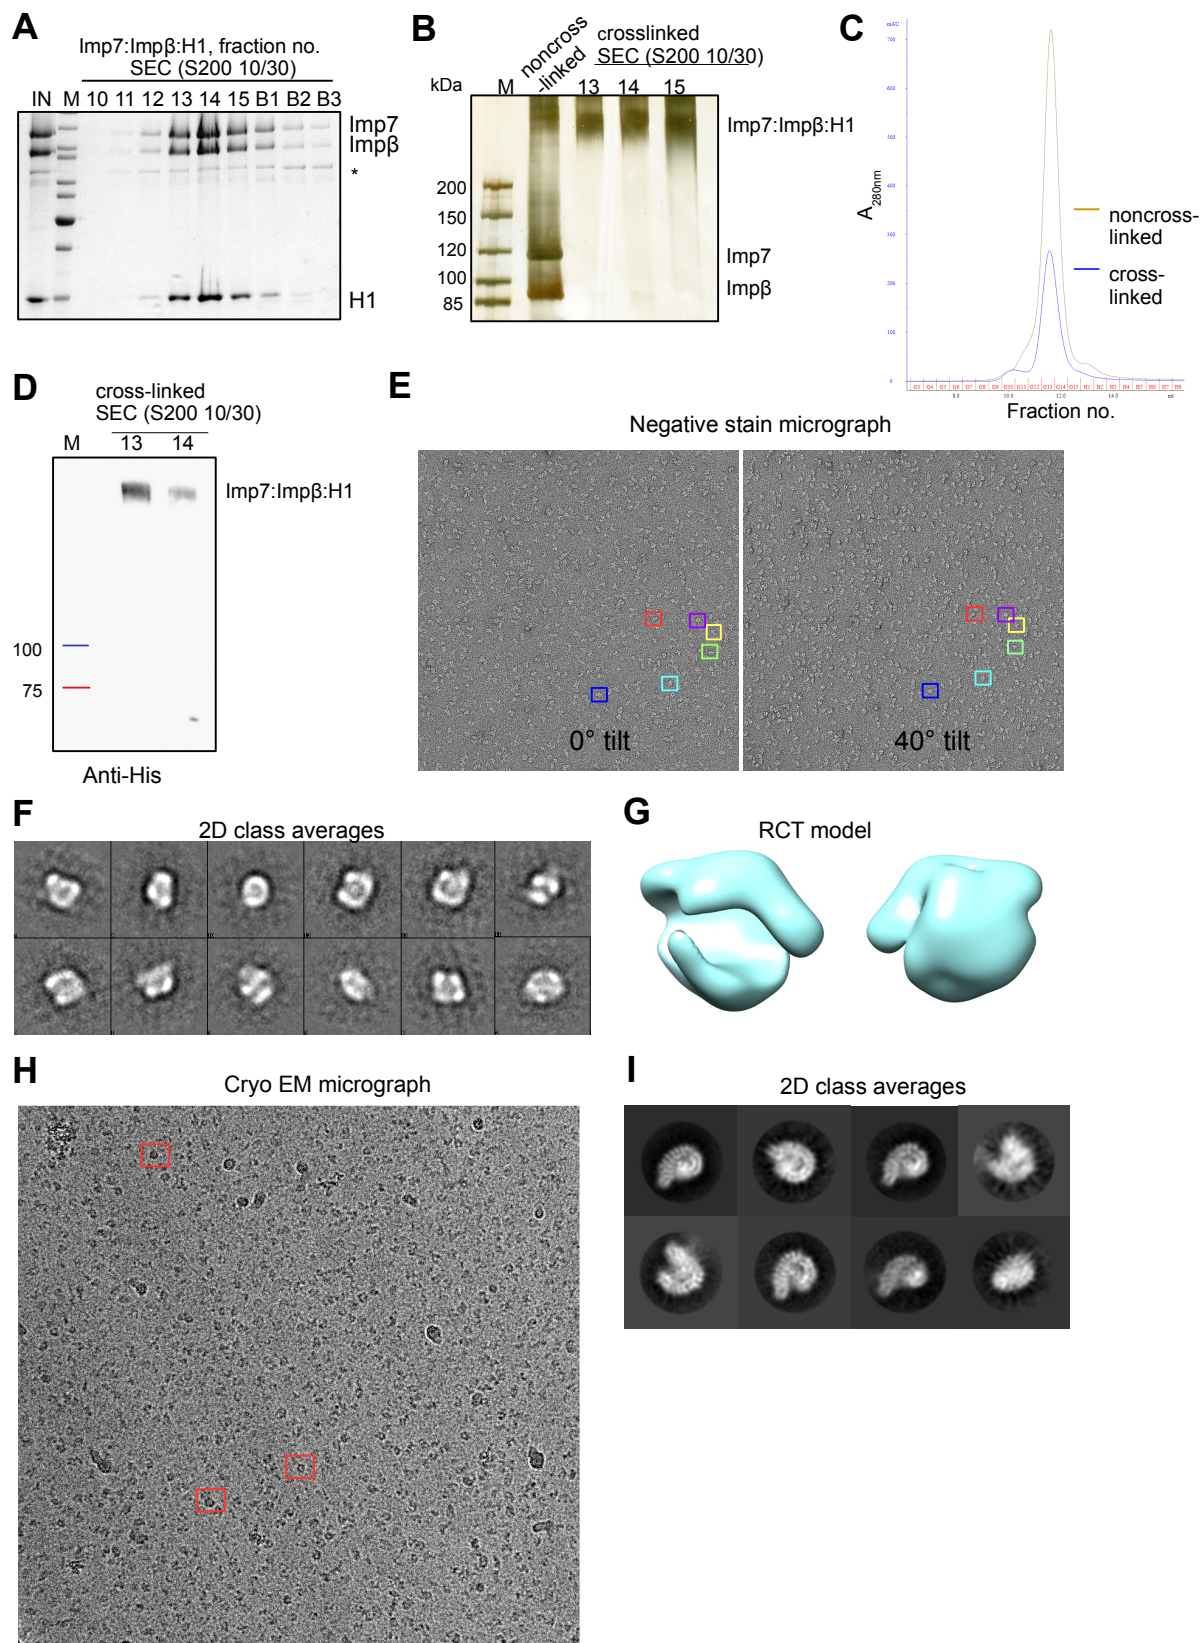

Figure S1

**Figure S1. Related to Figure 1. Assembly and Random Conical Tilt of the Imp7:Imp $\beta$ :H1.0 Complex.**

(A) SDS-PAGE analysis of the *in vitro* reconstituted complex after size-exclusion chromatography.

(B) SDS-PAGE analysis of the cross-linked Imp7:Imp $\beta$ :H1.0 after size-exclusion chromatography.

(C) Size-exclusion chromatogram: comparison of native and cross-linked Imp7:Imp $\beta$ :H1.0 indicating that both complexes have the same molecular weight.

(D) Anti-His Western blot analysis of cross-linked Imp7:Imp $\beta$ :H1.0 complex showing the presence of H1.0-His protein in the Imp7:Imp $\beta$ :H1.0 complex.

(E) A pair of untilted (left) and tilted (right) negative stain micrographs. Six tilt-pair particles are indicated with colored boxes, with each color indicating one molecule.

(F) 2D class averages of the untilted particle images.

(G) Representative initial 3D model obtained by the random conical tilt method.

(H) Representative cryo-EM micrograph of the Imp7:Imp $\beta$ :H1.0 complex.

(I) 2D class averages of particle images.

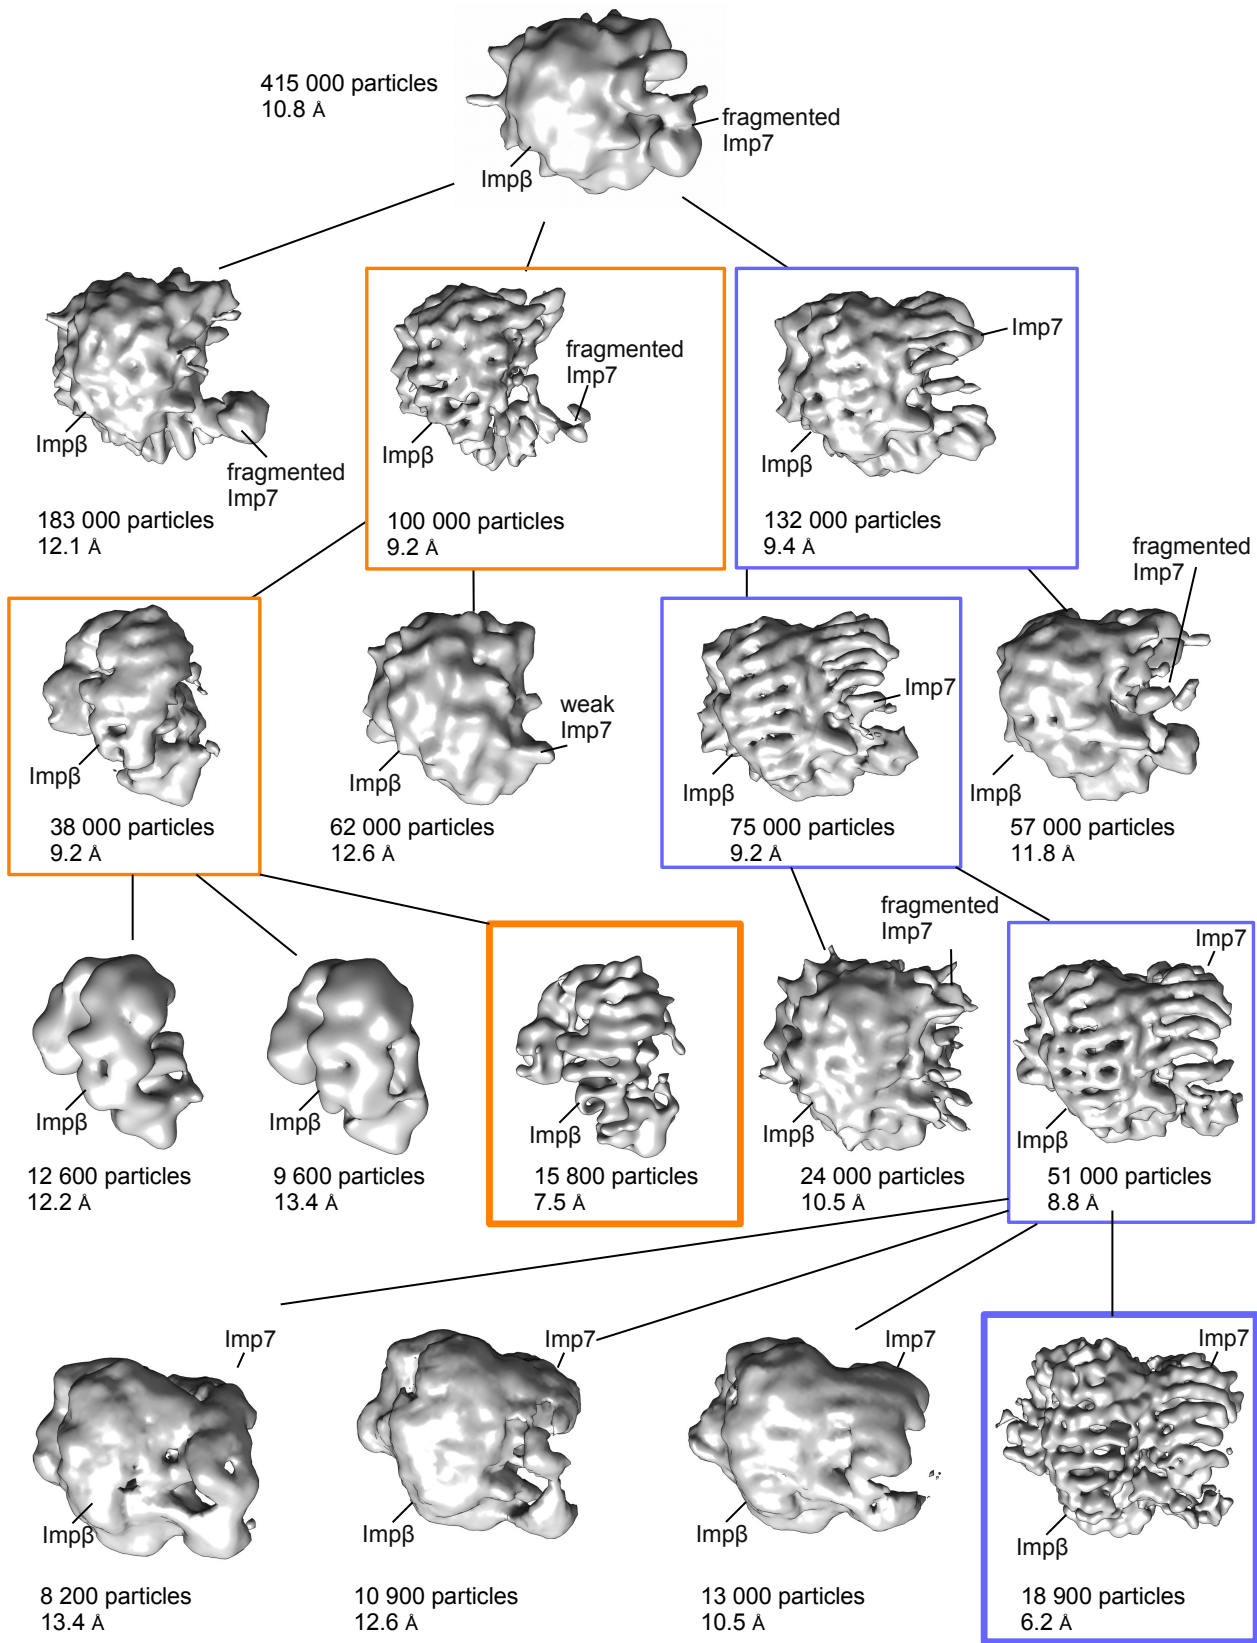

Figure S2

**Figure S2. Related to Figure 1. Classification of Cryo-EM Images.**

The overall dataset comprising 415000 particles was extensively 3D classified. It was first subdivided into three classes of different sizes, two of which were further classified (orange and blue box). The second (orange) class yielded after further sub-classification rounds the final Imp $\beta$ :H1.0 reconstruction and the third (blue) class the Imp7:Imp $\beta$ :H1.0.

Other interesting sub-classes contained Imp $\beta$  and fragmented Imp7 or the Imp7:Imp $\beta$ :H1.0 with the N-terminal HEAT-repeats of Imp7 missing.

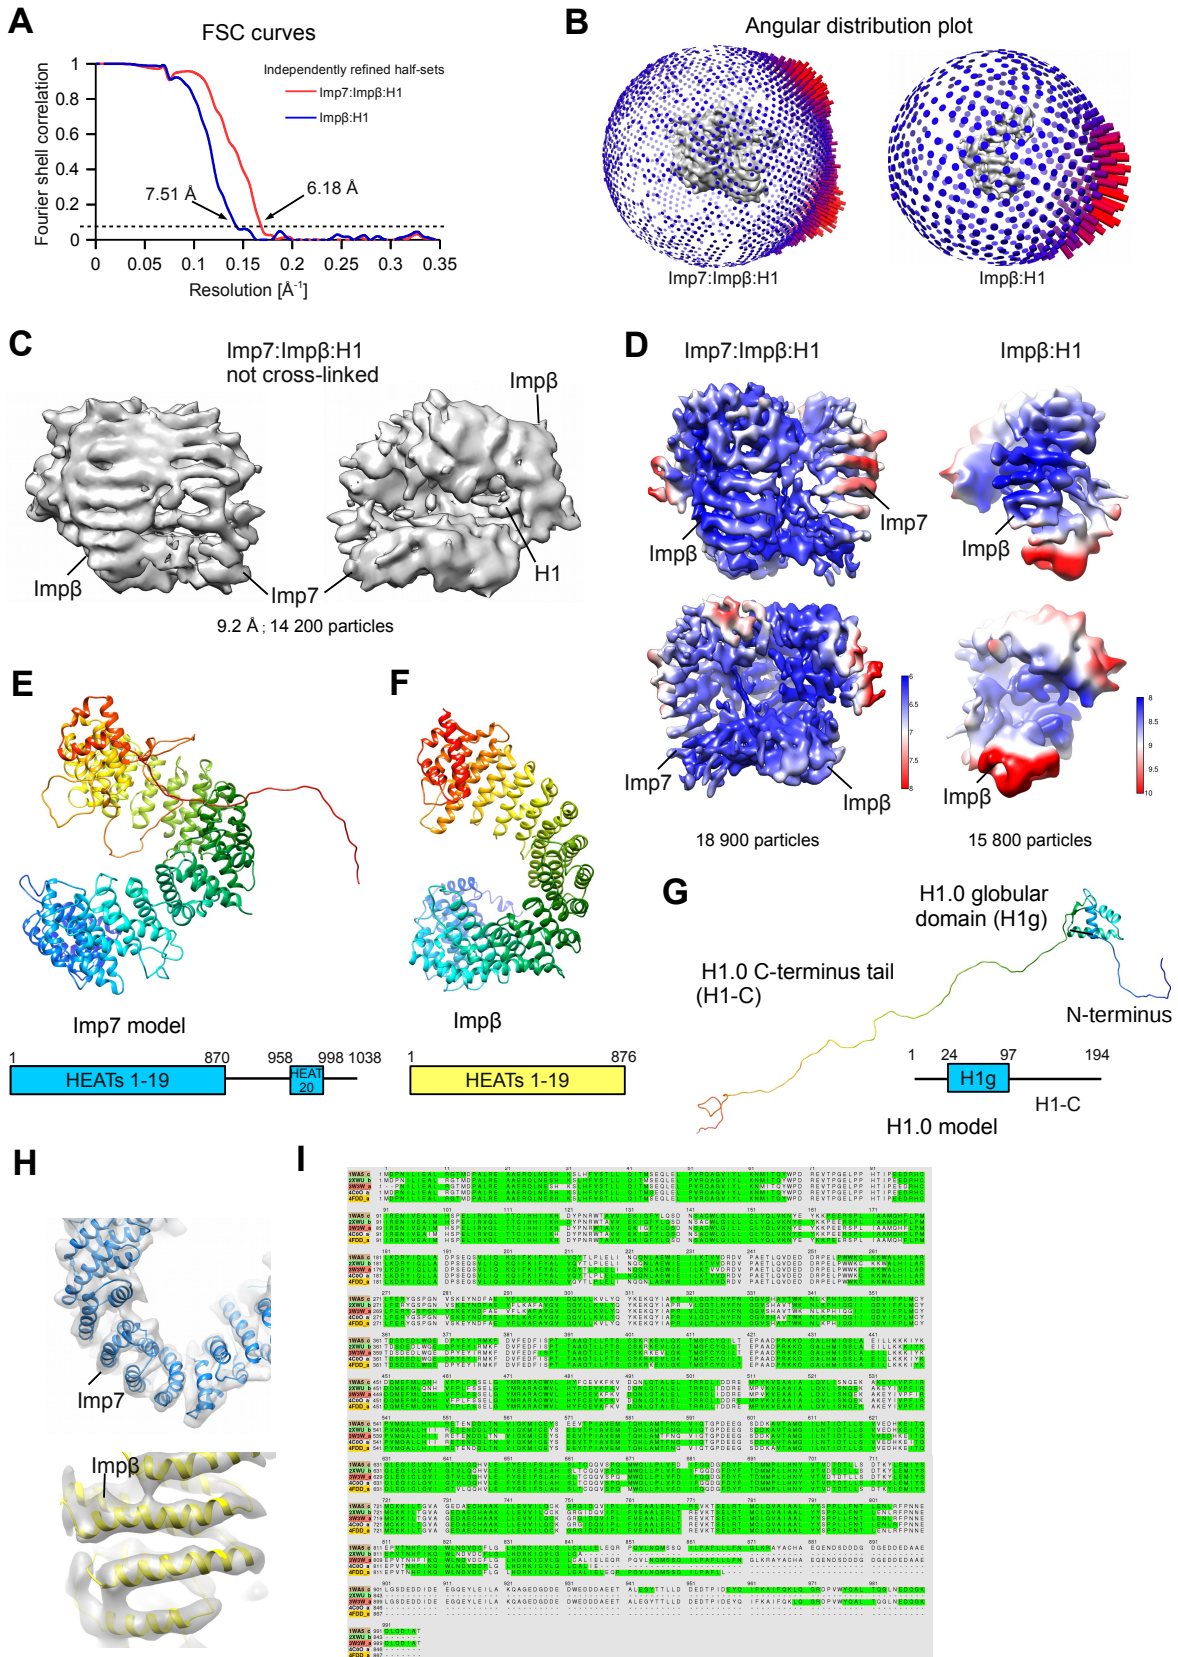

Figure S3

**Figure S3. Related to Figure 1. Cryo-EM Reconstruction of the Imp7:Imp $\beta$ :H1.0 Complex and Fitting of Models into the Cryo-EM Map.**

- (A) FSC curves for Imp7:Imp $\beta$ :H1.0 and Imp $\beta$ :H1.0 reconstructions. The resolutions according to the Fourier shell cutoff at 0.143 are 6.2 Å and 7.5 Å, respectively.
- (B) Angular distribution of the Imp7:Imp $\beta$ :H1.0 and Imp $\beta$ :H1.0 reconstructions.
- (C) Cryo-EM map of the not-cross-linked Imp7:Imp $\beta$ :H1.0 complex resolved to 9.2 Å.
- (D) Front and back views of not-sharpened Imp7:Imp $\beta$ :H1.0 and Imp $\beta$ :H1.0 reconstructions colored by local resolution. All the densities are shown at the same contour level and are filtered to local resolution. Resolution bars are shown on the right.
- (E) Model prediction for Imp7 obtained by the MODELLER software, using PDB 1WA5 as the template.
- (F) Crystal structure of Imp $\beta$  (PDB code: 3W5K).
- (G) Model of the histone H1.0 obtained by MODELLER, using PDB 5NL0 as the template.
- (E–G) Each model is colored using a spectrum from blue to red, which correspond to the N-terminus and C-terminus, respectively. A scheme showing the prediction for structured (filled box) and unstructured regions is shown below the model.
- (H) Representative EM density (gray) with fitted HEAT repeats from Imp7 (blue) and Imp $\beta$  (yellow).
- (I) Secondary structure predictions for Imp7, using various templates.



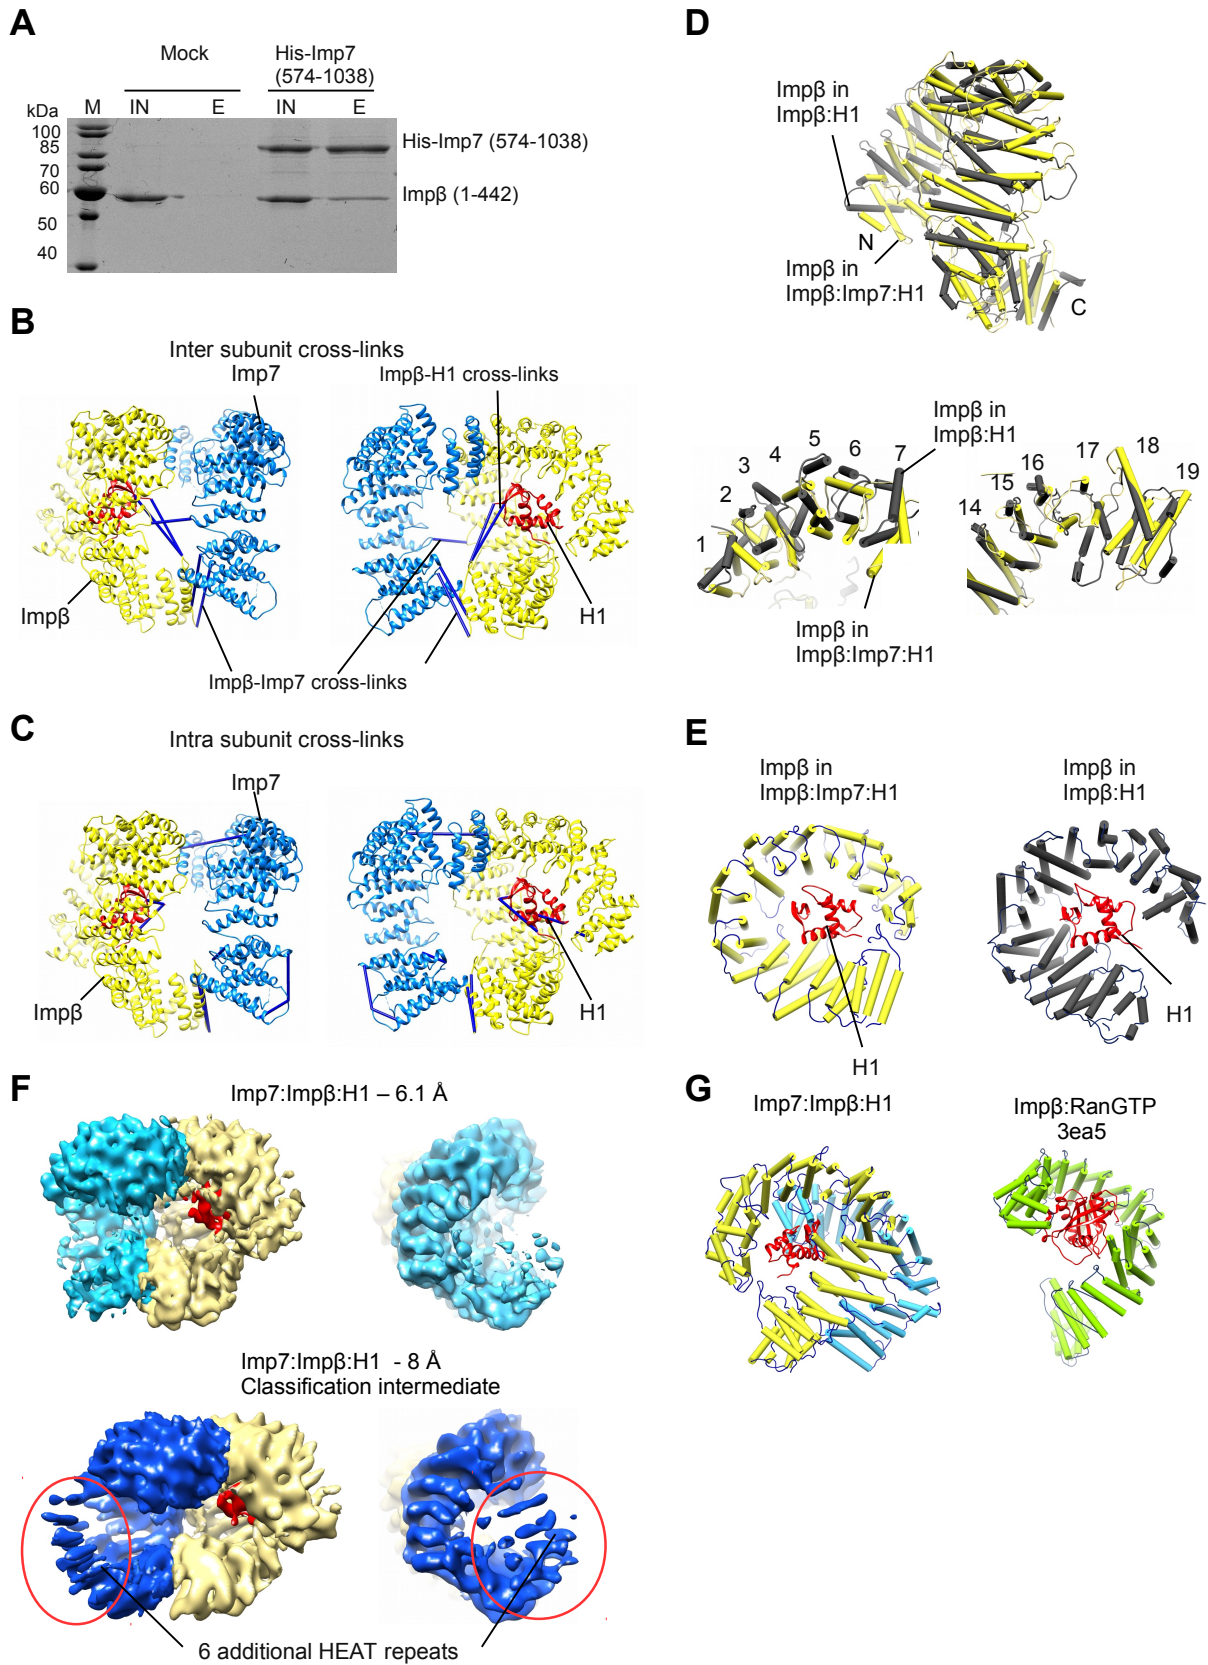

Figure S4

**Figure S4. Related to Figure 1. Cross-Linking Mass Spectrometry Supports the Imp7:Imp $\beta$ :H1.0 Model.**

**(A)** Results of a pull-down experiment showing that the N-terminal part of Imp $\beta$  (1-442) binds the C-terminal part of Imp7 (574-1038). SDS-PAGE analysis of input (IN) and elution (E) fractions of the pull-down experiment with His-tagged Imp7 (574-1038) bound to the resin.

**(B)** A model depicting inter-subunit lysine-lysine cross-links in the structured part of the Imp7:Imp $\beta$ :H1.0 complex. The spacer arm of the BS3 cross-linker reagent is 11.4 Å. The cross-links between lysine residues are within 25 Å of the backbone in this structure. The cross-links are consistent with the model.

**(C)** A model depicting intra-subunit lysine-lysine cross-links in the structured part of the Imp7:Imp $\beta$ :H1.0 complex. The cross-links between lysine residues are within 25 Å of the backbone in this structure. The cross-links are consistent with the model.

**(D)** Superimposition of Imp $\beta$  from the Imp7:Imp $\beta$ :H1.0 (yellow) and the Imp $\beta$ :H1.0 (gray) complex. Although the middle HEAT repeats of Imp $\beta$  are well aligned, the N- and C-terminal HEAT repeats are more open in the Imp $\beta$ :H1.0 complex. HEAT repeats of Imp $\beta$  are numbered.

**(E)** Comparison of Imp $\beta$ :H1.0 interaction in Imp7:Imp $\beta$ :H1.0 and Imp $\beta$ :H1.0. H1.0 is shown as a red ribbon. Imp $\beta$  (yellow) from the Imp7:Imp $\beta$ :H1.0 complex and Imp $\beta$  (gray) from Imp $\beta$ :H1.0 are displayed as cylinders.

**(F)** Comparison of the final map and a 3D classification intermediate of the Imp7:Imp $\beta$ :H1.0 complex. The final refined map of the Imp7:Imp $\beta$ :H1.0 complex is shown in the upper panel. In the final map, the Imp7 N-terminus is absent due to flexibility. The 3D classification intermediate, shown in the lower panel, has a density for the Imp7 N-terminus (HEAT repeats 1–6) at lower contour levels (red circle).

**(G)** Structures of Imp $\beta$  in complex with Imp7 and H1.0 and RanGTP. H1 and RanGTP are shown as red ribbons, Imp7 as blue cylinders, Imp $\beta$  in Imp7:Imp $\beta$ :H1.0 complex as yellow cylinders, and Imp $\beta$  in complex with RanGTP as green cylinders.

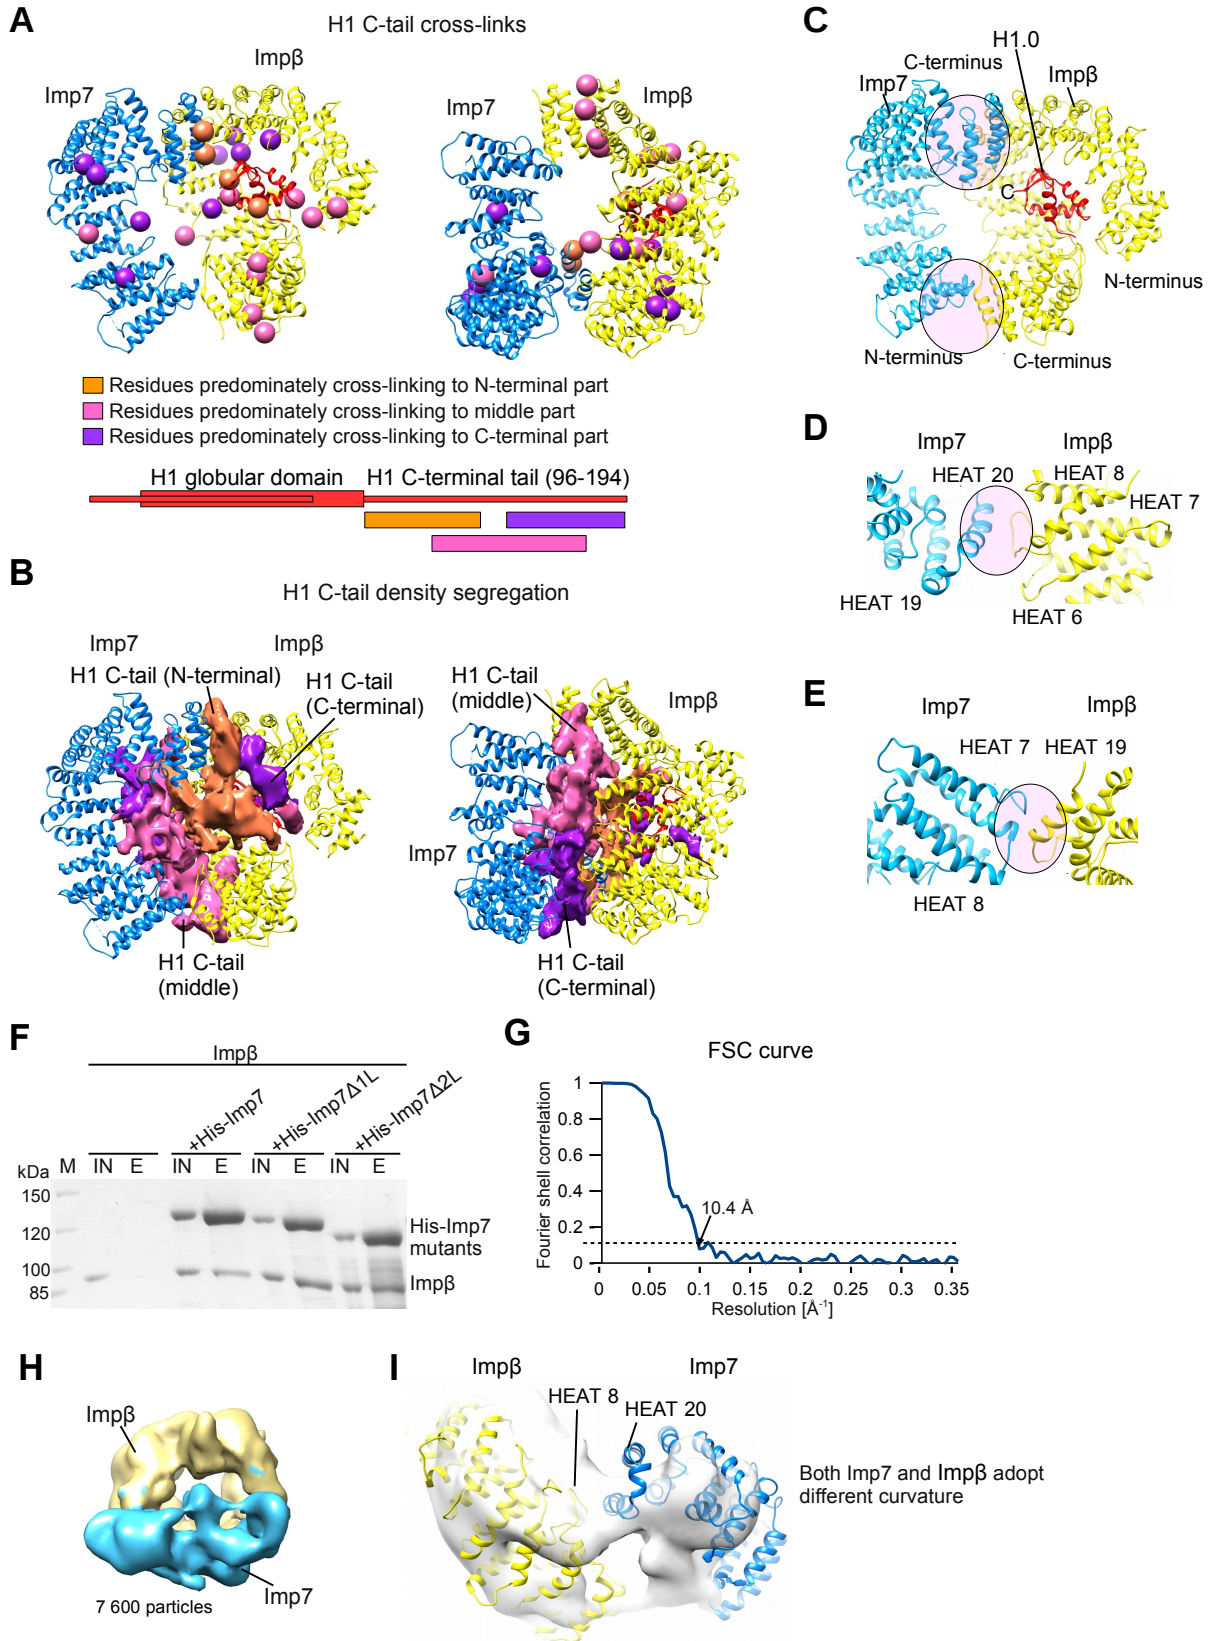

Figure S5

**Figure S5. Related to Figure 2 and 3. The H1 C-Terminal Tail Stabilizes the Imp7:Imp $\beta$ :H1.0 Complex.**

(A) Residues that cross-link with the C-terminal tail of H1 are depicted as spheres. Residues that cross-link predominantly to the N-terminal part of the H1 C-terminal tail are shown in orange; those that cross-link predominantly to the middle part in pink; and those that cross-link predominantly to the C-terminal part in violet. DMTMM, a zero-length cross-linker, was used in the reaction.

(B) Disordered density in the cradle and in between two importins was segregated based on the cross-linking mass-spectrometry data. The density in proximity to the importin residues that cross-link to the N-terminal part of the H1 C-terminal tail is shown in orange; that in proximity to the importin residues that cross-link to the middle part in pink; and that in proximity to the importin residues that cross-link to the C-terminal part in violet.

(C) Structural model of the Imp7:Imp $\beta$ :H1.0 complex. The N- and C- termini of each protein, as well as the contact areas between the importins (pink transparent circles), are indicated. Imp7 and Imp $\beta$  are shown in blue and yellow, respectively.

(D) Close-up view at the contact area between Imp7 HEAT repeat 20 and the loop connecting Imp $\beta$  HEAT repeats 7 and 8.

(E) Close-up view of the contact area between Imp7 HEAT repeats 7–8 and the inner helix of Imp $\beta$  HEAT repeat 19.

(F) Results of a pull-down experiment showing that Imp $\beta$  binds wild-type Imp7, Imp7 $\Delta$ 1L (884–912), and Imp7 $\Delta$ 2L (884–912 and 923–954) mutants with glycine-serine residues replacing acidic loops. SDS-PAGE analysis of input (IN) and elution (E) fractions of the pull-down experiment with His-tagged wild-type and mutant Imp7 bound to the resin.

(G) FSC curves for the Imp7:Imp $\beta$  reconstruction. The resolution according to the Fourier shell cutoff at 0.143 is 10.4 Å.

(H) Cryo-EM map of Imp7:Imp $\beta$  without H1.0 resolved to 10.4 Å. Imp $\beta$  is yellow, Imp7 is blue.

(I) Model of the Imp7:Imp $\beta$ :H1.0 complex superimposed on the Imp7:Imp $\beta$  map. Imp7 and Imp $\beta$  are shown in blue and yellow, respectively. Imp7 and Imp $\beta$  adopt different curvatures.

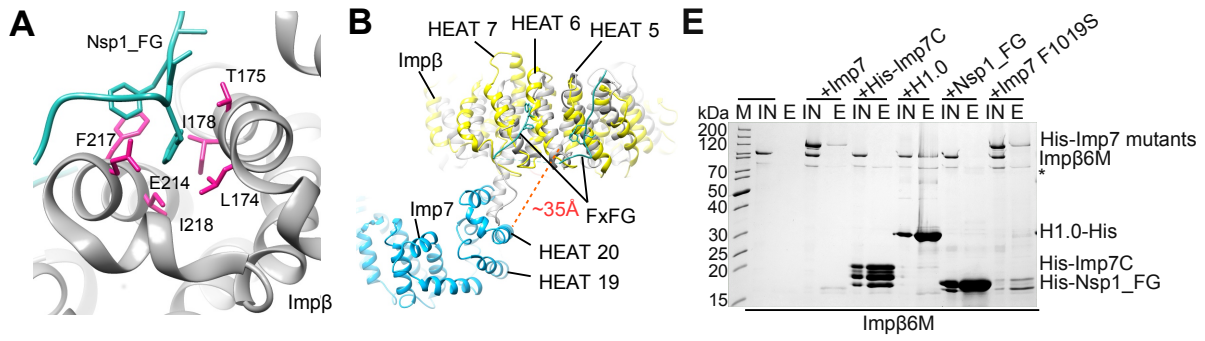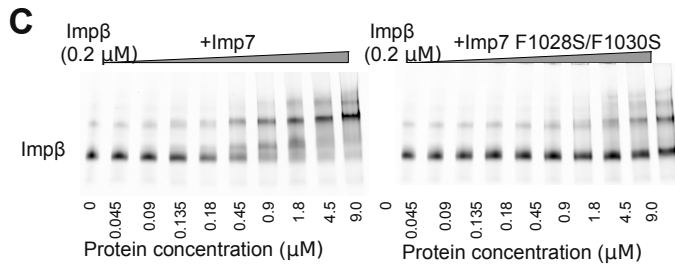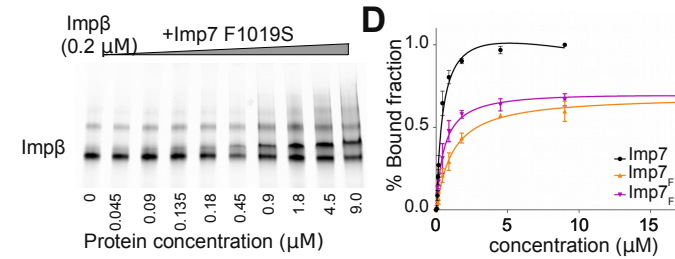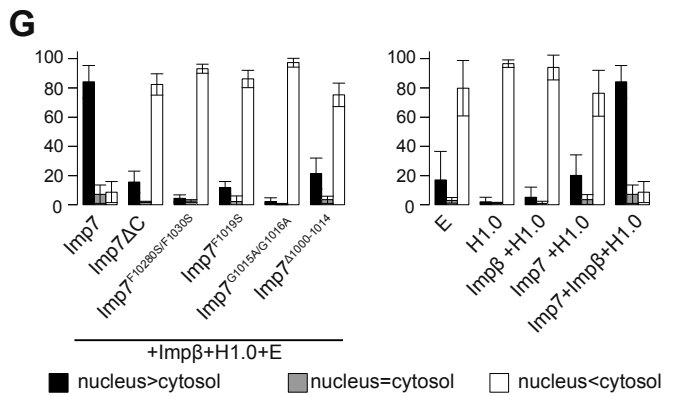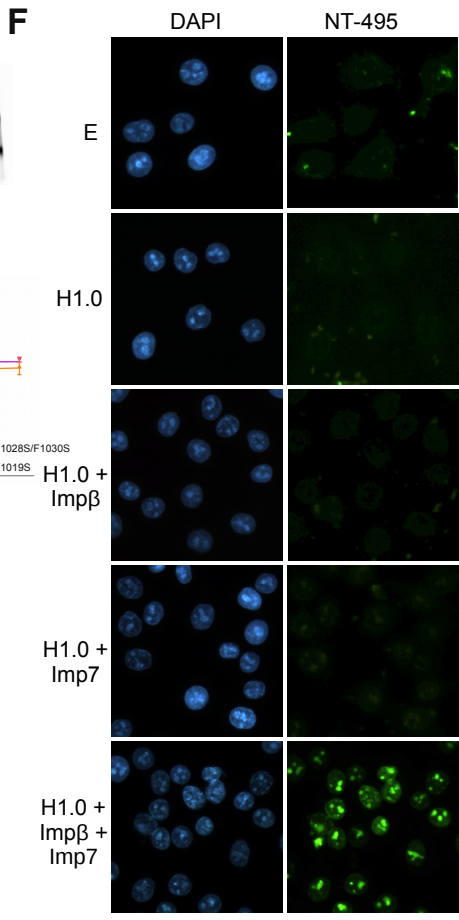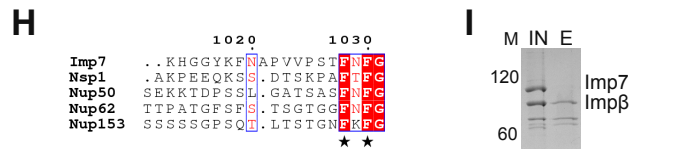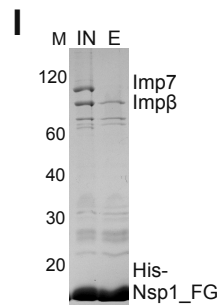

Figure S6

**Figure S6. Related to Figure 4 and 5. Interaction of the Imp7 C-Terminal Tail with the Imp $\beta$ :FG-Nucleoporin Binding Site.**

(A) Close-up view of Nsp1p FxFG repeats (green) binding to Imp $\beta$  (gray) between HEAT repeats 5–6 and 6–7 (PDB ID: 1F59). The primary FG binding site on Imp $\beta$  (gray) is shown with key residues in sticks. Residues mutated in the Imp $\beta$ 6M mutant are shown in pink.

(B) The Imp7:Imp $\beta$ :H1.0 cryo-EM model superimposed on the Imp $\beta$ :Nsp1p crystal structure (PDB ID: 1F59). HEAT repeats involved in binding are numbered, and FxFG repeats from the crystal structure are highlighted. Imp7 is shown in blue, Nsp1p in green, Imp $\beta$  from Imp7:Imp $\beta$ :H1.0 in yellow, and Imp $\beta$  from Imp $\beta$ :Nsp1p in gray.

(C) Results of a gel-shift assay showing the Imp7:Imp $\beta$  complex formation. Imp $\beta$  (0.2 $\mu$ M) was mixed with increasing amounts of Imp7 and Imp7 mutants.

(D) Results of a quantification of three independent gel-shift experiments showing Imp7 and Imp7-mutant binding to Imp $\beta$ . The K<sub>d</sub> for Imp7/Imp $\beta$  interaction was estimated from the binding curve. The K<sub>d</sub> for wild-type Imp7 is 0.38  $\mu$ M, for Imp7 F1028S/F1030S 2.9  $\mu$ M and for Imp7 F1019S 1.2  $\mu$ M.

(E) Results of a pull-down experiment showing that the canonical FG-nucleoporin binding site in Imp $\beta$  is essential for interaction with Imp7. SDS-PAGE analysis of input (IN) and elution (E) fractions of the pull-down experiment with Imp $\beta$ 6M (Imp $\beta$  L174S, T175A, I178D, E214A, F217A, and I218D) and resin-bound His-tagged Imp7, the Imp7 C-terminal tail, H1.0, Nsp1\_FG, and the Imp7 F1019S mutant. Degradation products of Imp $\beta$  and Imp7 are indicated with an asterisk.

(F) Results of a nuclear import assay in permeabilized HeLa S3 cells, using NT-495–labeled H1.0 in the presence of an energy-regenerating system (E), Imp $\beta$ , or wild type Imp7 was performed as described in the Methods section. H1 import into the nucleus is possible only when Imp7 and Imp $\beta$  transport receptors are present. In the panels in the left column, cell nuclei are stained with DAPI.

(G) Quantitative analysis of H1.0 nuclear import using an energy-regenerating system (E), Imp $\beta$ , and the wild-type Imp7 or its mutants. The fluorescence intensity of NT-495–labeled H1.0 was measured in 50 to 150 cells by using the ImageJ software (National Institutes of Health) and was scored into three categories: nucleus > cytosol; nucleus = cytosol; and nucleus < cytosol.

(H) Sequence alignment of Imp7 C-terminal tail and representatives of FG-nucleoporins. Phe residues in the FxFG motif are indicated with an asterisk.

(I) Results of a pull-down experiment showing that the FG-repeats from Nsp1 compete with Imp7 for binding site in Imp $\beta$ . SDS-PAGE analysis of input (IN) and elution (E) fractions of the pull-down experiment with the His-tagged Nsp1.

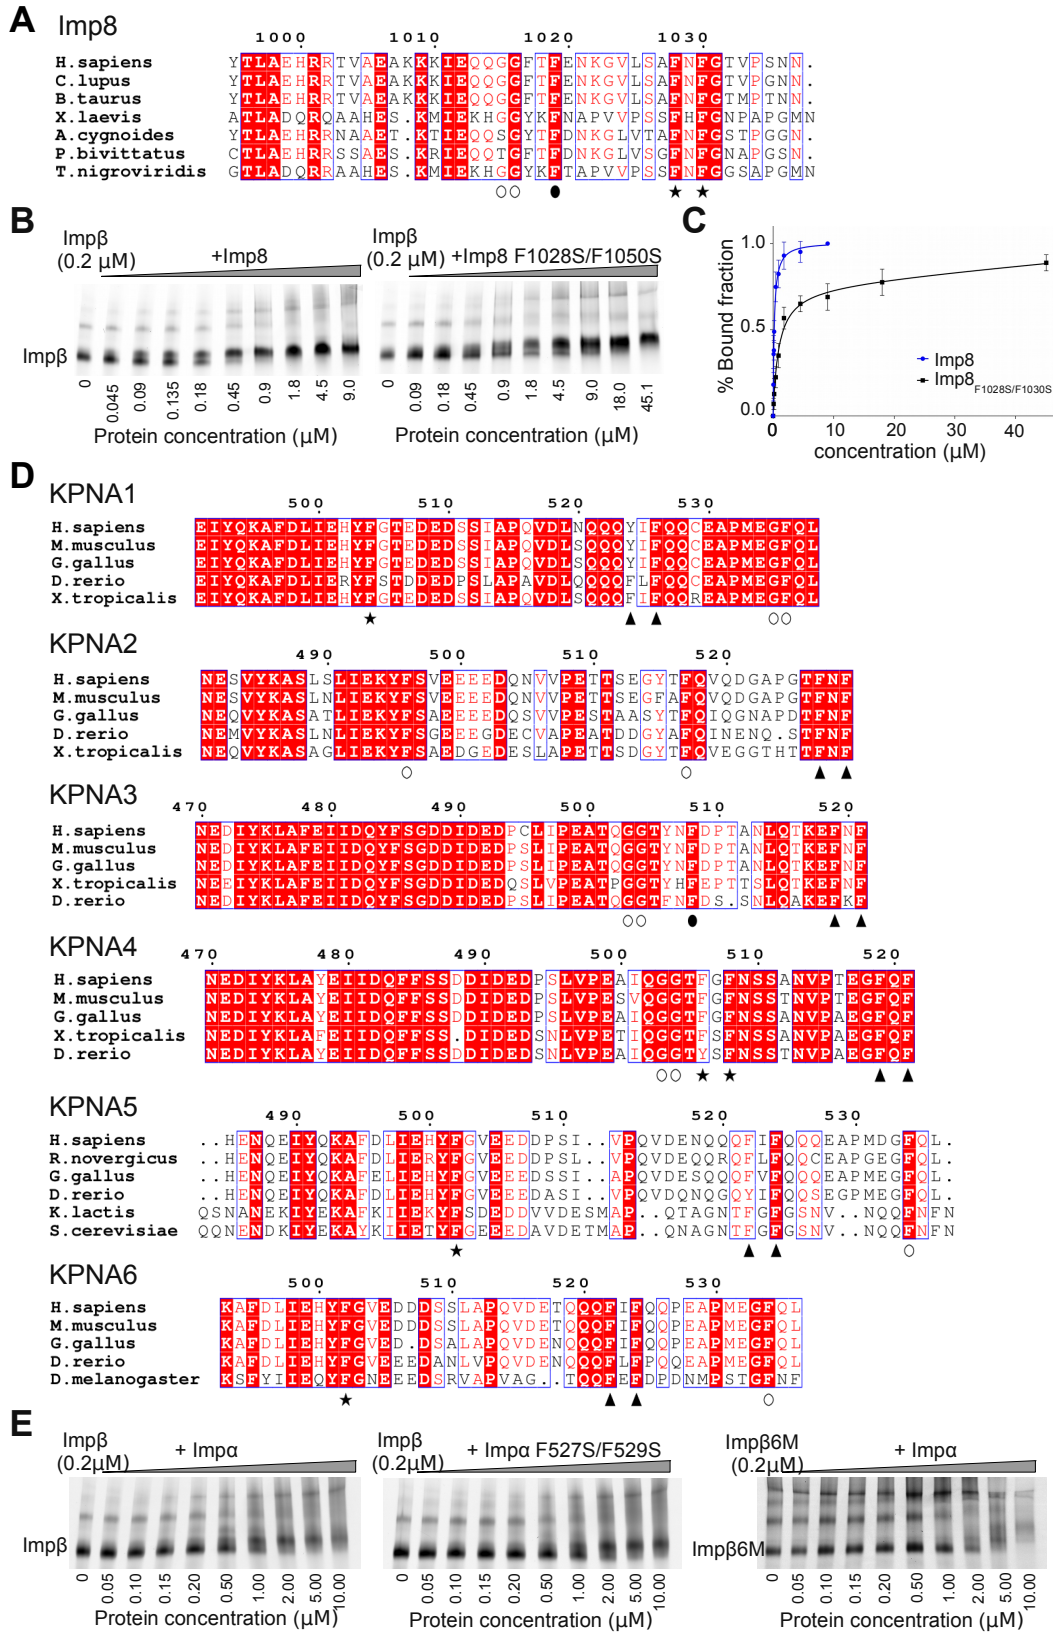

Figure S7

**Figure S7. Related to Figure 6. Sequence Alignment Showing That Other Importins Contain Conserved FxFG or Similar Motifs.**

- (A) Sequence alignment of Imp8 C-terminal tail (aas 995–1038). Phe residues in the FxFG motif are indicated with an asterisk. Gly and Phe residues in the GGxxF motif are indicated by white and black circles, respectively.
- (B) Results of a gel-shift assay showing the Imp8:Imp $\beta$  complex formation. Imp $\beta$  (0.2  $\mu$ M) was mixed with increasing amounts of Imp8 and Imp8 F1028S/F1030S mutant. Imp8 F1028S/F1030S mutant shows a ~10-fold reduction in binding to Imp $\beta$ .
- (C) Results of a quantification of three independent gel-shift experiments showing Imp8 and Imp8-mutant binding to Imp $\beta$ . The K<sub>d</sub> was estimated from the binding curve. The K<sub>d</sub> for wild type Imp8 is 0.19  $\mu$ M and for Imp8 F1028S/F1030S 1.7  $\mu$ M.
- (D) Sequence alignments of Imp $\alpha$  (K $\alpha$ ) C-terminal tails. Conserved Phe residues in FxF, GGxxF, FG, and GF motifs are highlighted.
- (E) Results of a gel-shift assay showing the Imp $\alpha$ :Imp $\beta$  complex formation. Imp $\beta$  (0.2  $\mu$ M) was mixed with increasing amounts of Imp $\alpha$  and Imp $\alpha$  F527S F529S mutant. Imp $\beta$ 6M mutant (0.2  $\mu$ M) was mixed with increasing amounts of Imp $\alpha$ . Both, Imp $\alpha$  and Imp $\beta$  mutants show reduced binding to wild type proteins.
